# Supplementary material for: Small molecules to regulate the GH/IGF1 axis by inhibiting the growth hormone receptor synthesis
Source: Front Endocrinol (Lausanne). 2022 Jul 28;13:926210. doi: 10.3389/fendo.2022.926210 (PMC9365994; doi:10.3389/fendo.2022.926210)
Supplement: Supplementary file 3 [file Table_2.xlsx]

## Sheet: Sheet1
CHEMISTRY	GHR INHIBITORS, BM#, IC50	IDNUMBER	MOLWEIGHT	MOLFORMULA	SALTDATA	TOTAL_MOLWEIGHT
		AE-413/20011016	286.071	C8 H7 I N4		286.1
		AH-262/31834004	221.215	C10 H11 N3 O3		221.2
		AH-262/34226016	258.505	C8 H5 Br Cl N3		258.5
		AA-504/32626005	334.209	C15 H13 Cl2 N5		334.2
		AE-413/30061039	209.639	C8 H8 Cl N5		209.6
		AE-641/01674014	186.217	C10 H10 N4		186.2
		AK-105/40836823	364.301	C17 H12 F4 N4 O		364.3
		AK-105/40689752	359.455	C20 H17 N5 S		359.5
		AK-105/40694114	322.332	C16 H17 F3 N4		322.3
		AK-105/40833823	219.247	C10 H13 N5 O		219.2
		AE-413/20011015	239.075	C8 H7 Br N4		239.1
		AE-848/31943009	272.35	C15 H20 N4 O		272.4
		AE-413/36101006	229.069	C8 H6 Cl2 N4		229.1
	BM003, IC50: 50 nM	AA-504/32626008	369.423	C19 H23 N5 O3	HCl	405.9
		AG-205/01824055	177.166	C7 H7 N5 O		177.2
		AB-323/13887305	218.219	C9 H10 N6 O		218.2
		AK-105/40836825	368.822	C19 H17 Cl N4 O2		368.8
		AK-105/40833947	427.472	C23 H24 F3 N5		427.5
		\	299.16	C12 H12 Cl2 N4 O		299.2
	BM013, IC50: 900 nM	AK-105/40837629	318.301	C16 H13 F3 N4		318.3
		AE-413/20011011	204.232	C10 H12 N4 O		204.2
		AE-848/32191056	244.296	C13 H16 N4 O		244.3
		AG-690/11959584	289.333	C15 H19 N3 O3		289.3
		AE-848/36080040	245.285	C12 H15 N5 O		245.3
		AG-690/09329022	307.355	C17 H17 N5 O		307.4
		AB-323/13887312	206.208	C8 H10 N6 O		206.2
	BM009, IC50: 600 nM	AK-105/40836874	253.308	C14 H15 N5		253.3
	BM010, IC50: 800 nM	AK-105/40833946	427.472	C23 H24 F3 N5		427.5
		AK-105/40689771	290.452	C17 H30 N4		290.5
		AK-105/40694008	420.52	C23 H31 F3 N4		420.5
		AE-413/20090042	191.193	C8 H9 N5 O		191.2
		AF-399/32357045	214.271	C12 H14 N4		214.3
		AA-504/33316041	193.184	C8 H8 F N5		193.2
		AG-205/33668027	293.329	C16 H15 N5 O		293.3
		AM-814/41091179	188.233	C10 H12 N4		188.2
		AJ-292/13489108	289.333	C15 H19 N3 O3		289.3
		AK-105/40836877	323.225	C15 H16 Cl2 N4		323.2
		AK-105/40837671	441.485	C22 H27 N5 O5		441.5
		AK-105/40689863	189.221	C9 H11 N5		189.2
		AK-105/40694130	424.468	C24 H23 F3 N4		424.5
		AE-413/20090043	186.177	C8 H6 N6		186.2
		AT-417/43484803	258.327	C13 H18 N6		258.3
		AJ-292/08600004	231.258	C11 H13 N5 O		231.3
		AL-281/36996279	320.375	C13 H16 N6 O2 S		320.4
		AB-323/13887322	238.253	C12 H10 N6		238.3
		AJ-292/15300112	259.307	C14 H17 N3 O2		259.3
	BM008, IC50: 500 nM	AK-105/40837674	278.357	C17 H18 N4	CH3OH	310.4
	BM011, IC50: 900 nM	AK-105/40837563	328.394	C16 H16 N4 O2 S		328.4
		AK-105/40689786	251.292	C14 H13 N5		251.3
		AR-682/43286375	293.329	C16 H15 N5 O		293.3
		AE-413/30061028	178.169	C8 H7 F N4		178.2
		AI-067/31569007	222.678	C10 H11 Cl N4		222.7
		AG-690/08511007	230.27	C12 H14 N4 O		230.3
AG-664/31380005		AG-664/31380005	215.259	C11 H13 N5		215.3
AE-413/13528006		AE-413/13528006	369.379	C18 H19 N5 O4		369.4
AK-105/40836388		AK-105/40836388	280.329	C16 H16 N4 O		280.3
		AK-105/40837677	272.738	C14 H13 Cl N4		272.7
		AK-105/40693423	228.297	C13 H16 N4		228.3
	BM006 IC50: 200nM	AK-105/40693663	274.341	C15 H19 F N4		274.3
		AO-364/42192293	350.42	C20 H22 N4 O2	HCl	386.9
		AE-413/30061042	258.202	C10 H9 F3 N4 O		258.2
		AT-417/43484799	249.704	C11 H12 Cl N5		249.7
		AJ-292/36454012	289.333	C15 H19 N3 O3		289.3
		AO-079/15259127	252.28	C13 H12 N6		252.3
		AE-413/13528004	351.26	C15 H12 Cl2 N4 S		351.3
	BM014, IC50: 900 nM	AK-105/40836387	230.27	C12 H14 N4 O		230.3
		AK-105/40693577	336.393	C19 H20 N4 O2		336.4
	BM007, IC50: 400 nM	AK-105/40833503	418.383	C19 H20 F6 N4		418.4
		AK-105/40689757	206.291	C11 H18 N4		206.3
		AO-364/42192200	266.303	C15 H14 N4 O	HCl	302.8
		AM-944/40947424	164.124	C6 H4 N4 O2		164.1
		AT-417/43484851	229.286	C12 H15 N5		229.3
		AA-504/32626004	283.309	C15 H14 F N5		283.3
		AE-413/30061029	179.153	C8 H6 F N3 O		179.2
		AE-413/13528008	223.166	C8 H6 F N5 O2		223.2
	BM001, EC50: 20-30 nM	AK-105/40836349	334.343	C17 H17 F3 N4		334.3
		AK-105/40693516	186.217	C10 H10 N4		186.2
	BM002, IC50: 50nM	AK-105/40837635	275.314	C16 H13 N5		275.3
	BM005, IC50: 200 nM	AK-105/40833746	455.512	C23 H29 N5 O5		455.5
		AJ-292/42032260	266.307	C14 H14 N6		266.3
		AO-364/42192313	310.355	C17 H18 N4 O2	HCl	346.8
		AO-364/42192209	252.276	C14 H12 N4 O	HCl	288.7
		AH-262/34226008	214.054	C8 H5 Cl2 N3		214.1
		AG-205/25000533	176.182	C7 H8 N6		176.2
		AG-205/40121018	201.232	C10 H11 N5		201.2
		AO-364/42192207	296.328	C16 H16 N4 O2	HCl	332.8
		AE-641/11703093	313.747	C15 H12 Cl N5 O		313.7
		AE-413/30123006	162.151	C7 H6 N4 O		162.2
		AK-918/40099048	266.101	C9 H8 Br N5		266.1
		AE-641/11701006	355.827	C18 H18 Cl N5 O		355.8
		AC-907/30063049	231.254	C12 H13 N3 O2		231.3
		AF-399/25051013	231.254	C12 H13 N3 O2		231.3
		AO-364/42192208	280.329	C16 H16 N4 O	HCl	316.8
		AE-641/11703024	341.8	C17 H16 Cl N5 O		341.8
		AB-323/25048182	138.173	C6 H10 N4		138.2
		AE-848/31926053	239.661	C10 H10 Cl N3 O2		239.7
		AO-364/42192292	350.42	C20 H22 N4 O2	HCl	386.9
		AE-641/11702985	265.703	C11 H12 Cl N5 O		265.7
		AP-782/41885512	163.139	C6 H5 N5 O		163.1
		AG-690/11155024	443.25	C20 H13 Br F2 N4 O		443.3
		AO-364/42192307	340.381	C18 H20 N4 O3	HCl	376.8
		AE-641/11703008	265.703	C11 H12 Cl N5 O		265.7
		AC-907/34122051	263.731	C12 H14 Cl N5		263.7
		AO-364/42192202	266.303	C15 H14 N4 O	HCl	302.8
		AE-641/37091014	251.676	C10 H10 Cl N5 O		251.7
		AE-413/25046001	185.189	C9 H7 N5		185.2
		AO-364/42192221	252.276	C14 H12 N4 O	HCl	288.7
		AB-323/13887316	176.182	C7 H8 N6		176.2
		AE-413/30061047	206.164	C7 H6 N6 O2		206.2
